# Supplementary material
Source: PubMed Central journal article supplement (PMC10023834)
Supplement: NIHMS1826980-supplement-supinfo.pdf [file NIHMS1826980-supplement-supinfo.pdf]

## **Supplementary Material**

**Article Title:** Severe Neighborhood Deprivation and US Nursing Home Staffing

**Supplementary Table S1.** Adjusted staffing rates among US nursing homes by neighborhood deprivation

**Supplementary Table S2.** Acuity-adjusted staffing rates among US nursing homes by neighborhood deprivation

**Supplemental Table S1.** Adjusted Staffing Differences by Facility-Level Neighborhood Socioeconomic Disadvantage

| <b>Position</b>             | <b>Staffing hours per 100-resident days (95% CI) in facilities in disadvantaged areas relative to more advantaged facilities<sup>1</sup></b> |
|-----------------------------|----------------------------------------------------------------------------------------------------------------------------------------------|
| Registered Nurse            | -5.6 (-6.9 to -4.2)                                                                                                                          |
| Licensed Practical Nurse    | 0.03 (-1.3 to 1.4)                                                                                                                           |
| Certified Nursing Assistant | -3.2 (-5.6 to -0.9)                                                                                                                          |
| Physical Therapist (PT)     | -1.5 (-1.8 to -1.1)                                                                                                                          |
| PT Assistant                | -1.3 (-1.7 to -0.9)                                                                                                                          |
| Occupational Therapist (OT) | -1.5 (-1.8 to -1.1)                                                                                                                          |
| OT Assistant                | -0.9 (-1.3 to -0.5)                                                                                                                          |
| Medical Social Worker       | -0.4 (-0.7 to -0.2)                                                                                                                          |
| Speech Language Pathologist | -0.6 (-0.8 to -0.4)                                                                                                                          |

<sup>1</sup> *Estimated from marginal linear regression model adjusted for state and rurality fixed effects, with sandwich type standard errors to account for clustering of facilities within county.*

**Supplemental Table S2.** Acuity-Adjusted Staffing Differences by Facility-Level Neighborhood Socioeconomic Disadvantage

| <b>Position</b>             | <b>Staffing hours per 100-resident days (95% CI) in facilities in disadvantaged areas relative to more advantaged facilities<sup>1</sup></b> |
|-----------------------------|----------------------------------------------------------------------------------------------------------------------------------------------|
| Registered Nurse            | -5.4 (-6.7 to -4.1)                                                                                                                          |
| Licensed Practical Nurse    | 0.3 (-1.0 to 1.6)                                                                                                                            |
| Certified Nursing Assistant | -2.9 (-5.2 to -0.5)                                                                                                                          |
| Physical Therapist (PT)     | -1.5 (-1.8 to -1.1)                                                                                                                          |
| PT Assistant                | -1.3 (-1.7 to -0.9)                                                                                                                          |
| Occupational Therapist (OT) | -1.5 (-1.8 to -1.1)                                                                                                                          |
| OT Assistant                | -0.9 (-1.3 to -0.5)                                                                                                                          |
| Medical Social Worker       | -0.4 (-0.7 to -0.2)                                                                                                                          |
| Speech Language Pathologist | -0.6 (-0.8 to -0.4)                                                                                                                          |

<sup>1</sup> *Estimated from marginal linear regression model adjusted for state and rurality fixed effects as well as facility-level acuity index, with sandwich type standard errors to account for clustering of facilities within county.*
